# Supplementary material for: Role of CTCF in Regulating SLC45A3-ELK4 Chimeric RNA
Source: PLoS One. 2016 Mar 3;11(3):e0150382. doi: 10.1371/journal.pone.0150382 (PMC4777538; doi:10.1371/journal.pone.0150382)
Supplement: S2 Table — (XLS) [file pone.0150382.s008.xls]

## Sheet: Sheet1
	Gleason	Stage
C1	8	3a
C3	6	2b
C4	8	3a
C5	6	2c
C7	7	2c
C8	6	2c
C12	7	2c
C13	7	3a
C14	6	2c
C15	7	2c
